# Supplementary material
Source: MDPI journal article supplement (https://www.mdpi.com/search?q=ijms-21-02616)
Supplement: s001 [file ijms-21-02616-s001.pdf]

(Supplementary material)

**Synthesis and cytotoxic activity evaluation of new Cu(I) complexes of bis(pyrazol-1-yl)acetate ligands functionalized with an NMDA receptor antagonist**

Maura Pellei, Luca Bagnarelli, Lorenzo Luciani, Fabio Del Bello,\* Gianfabio Giorgioni, Alessandro Piergentili, Wilma Quaglia, Michele De Franco, Valentina Gandin,\* Cristina Marzano, Carlo Santini

**Table of Contents:**

- Figure S1:** Spectra of solutions containing CT-DNA (0.14 mM) and increasing concentrations of ligands and related complexes **1-8** in Tris-HCl buffer, pH =7.3.
- Figure S2:**  $^{13}\text{C}$  NMR spectra of  $\text{L}^{\text{H}}$  and  $\text{L}^2\text{H}$ .
- Figure S3:**  $^{13}\text{C}$  NMR spectra of  $\text{L}^{\text{NMDA}}$  and  $\text{L}^{2\text{NMDA}}$ .
- Figure S4:**  $^1\text{H}$  NMR and  $^{13}\text{C}$  NMR spectra of **1**.
- Figure S5:**  $^1\text{H}$  NMR spectrum of **3**.
- Figure S6:**  $^1\text{H}$  NMR spectrum of **5**.
- Figure S7:**  $^1\text{H}$  NMR spectrum of **6**.
- Figure S8:**  $^1\text{H}$  NMR,  $^{13}\text{C}$  NMR and C/H COSY spectra of **7**.
- Figure S9:**  $^1\text{H}$  NMR,  $^{13}\text{C}$  NMR and C/H COSY spectra of **8**.

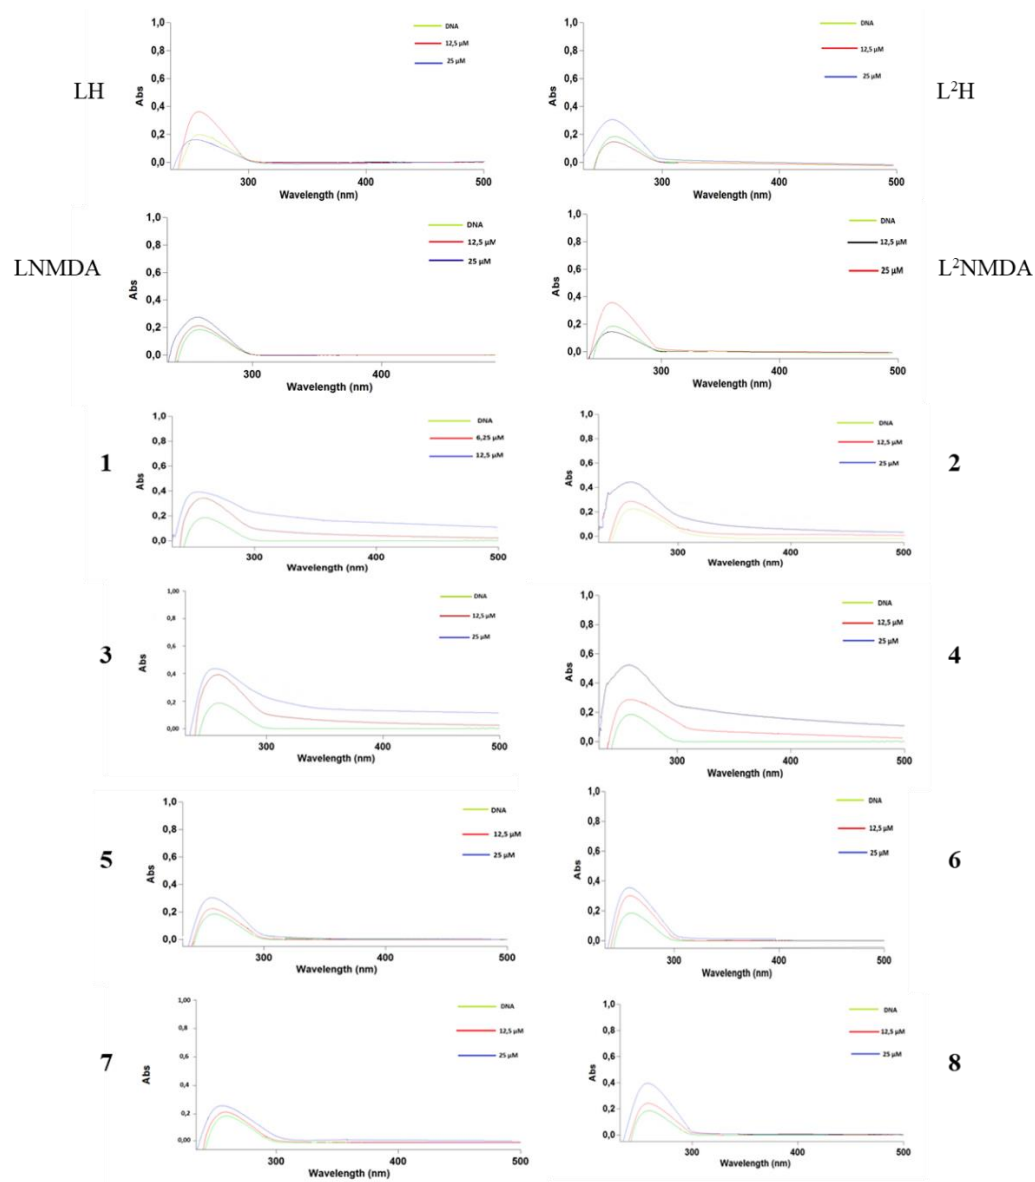

**Figure S1.** Spectra of solutions containing CT-DNA (0.14 mM) and increasing concentrations of ligands and related complexes **1-8** in Tris-HCl buffer, pH =7.3.

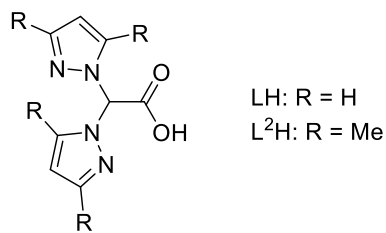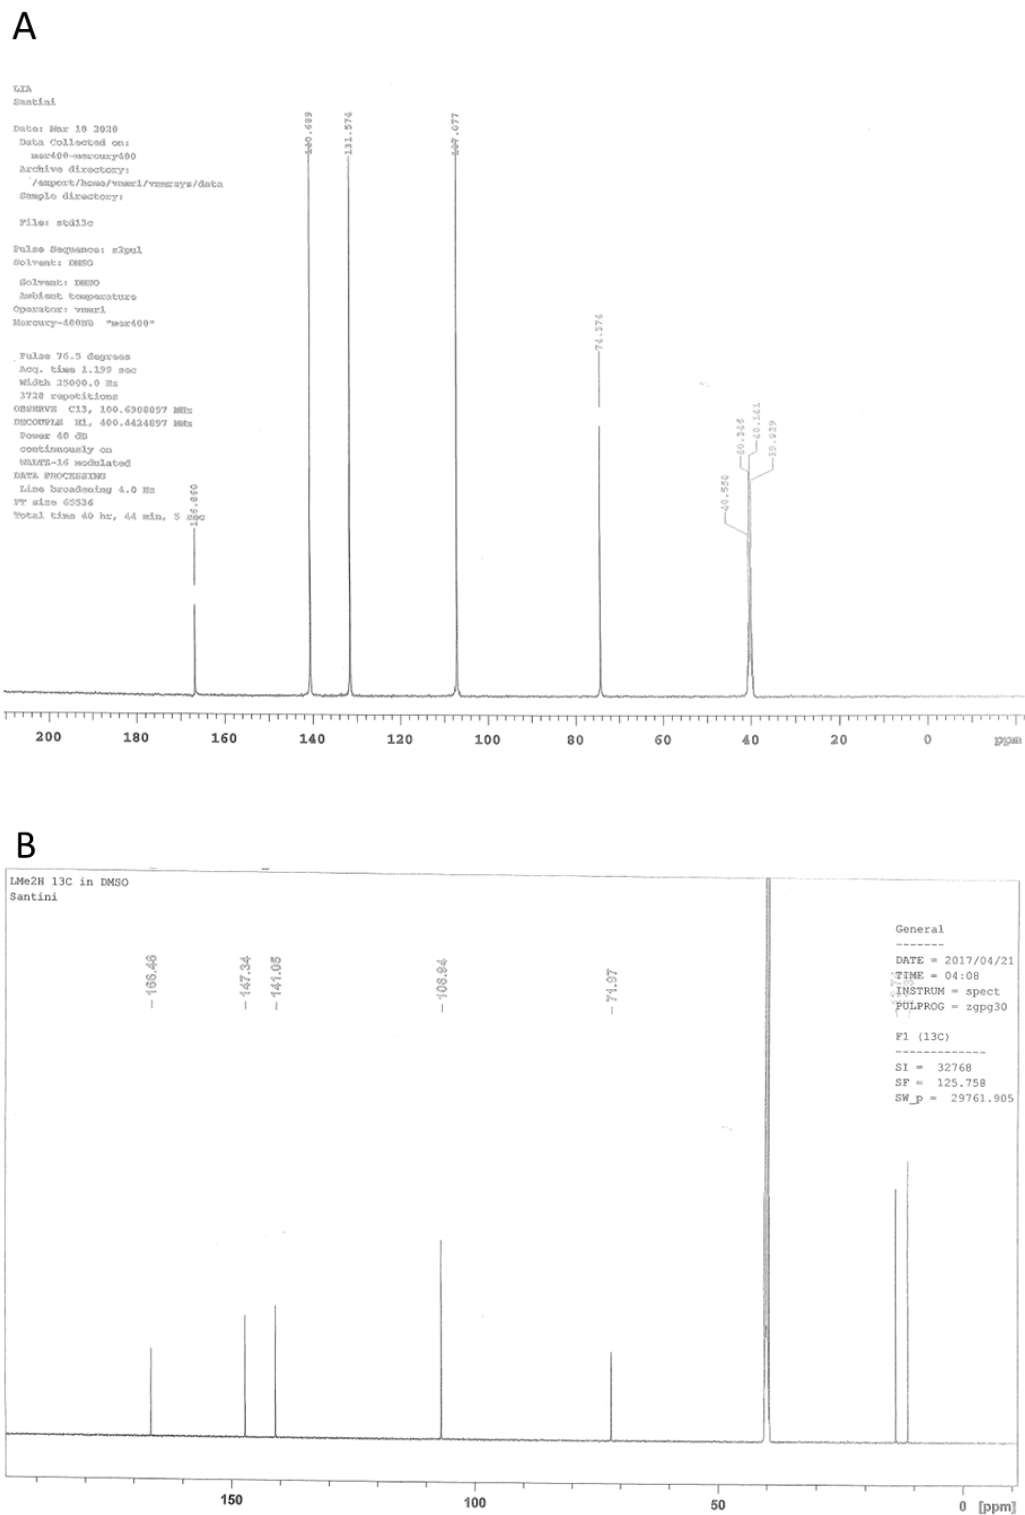

**Figure S2.** <sup>13</sup>C NMR spectra of (A) LH and (B) L<sup>2</sup>H.

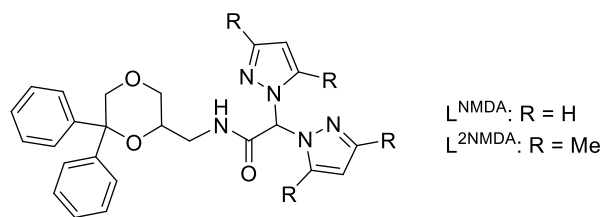

**A**

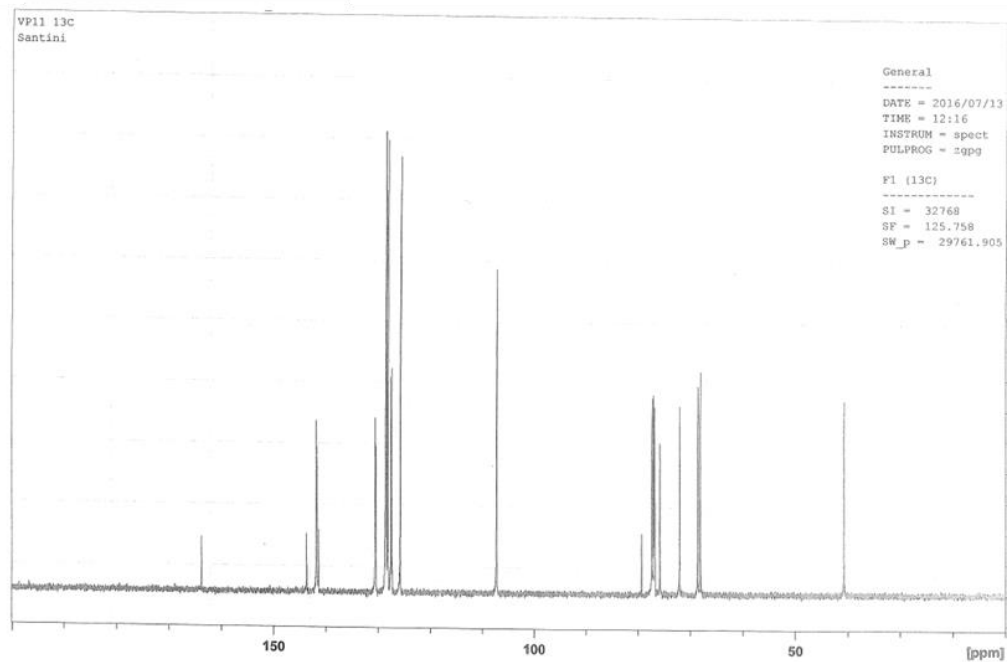

**B**

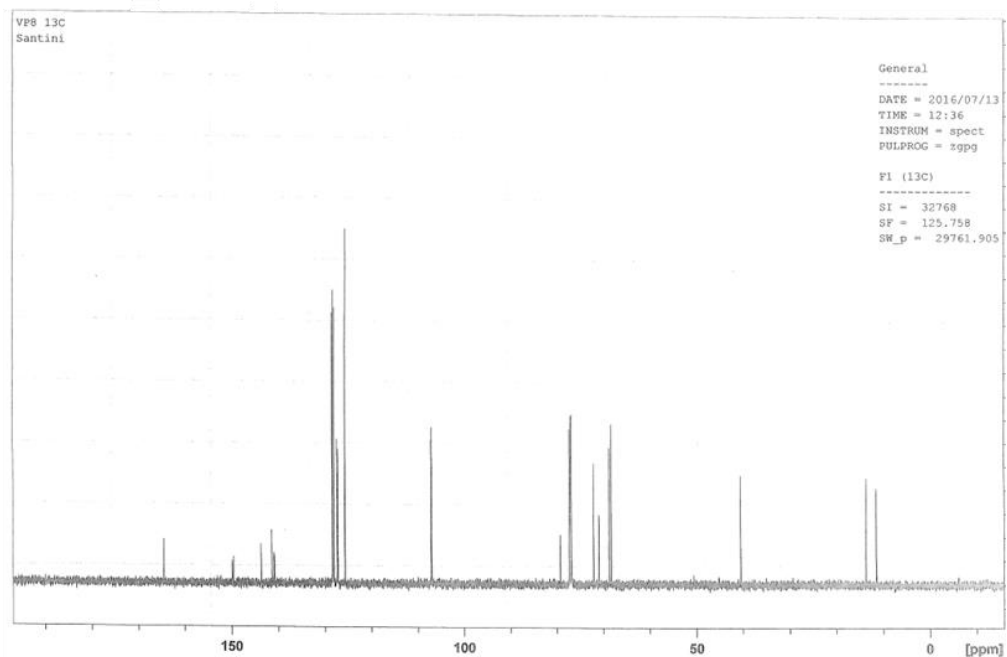

**Figure S3:**  $^{13}\text{C}$  NMR spectra of (A)  $L^{NMDA}$  and (B)  $L^{2NMDA}$ .

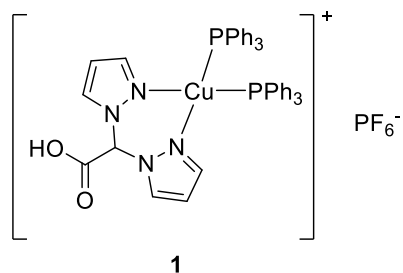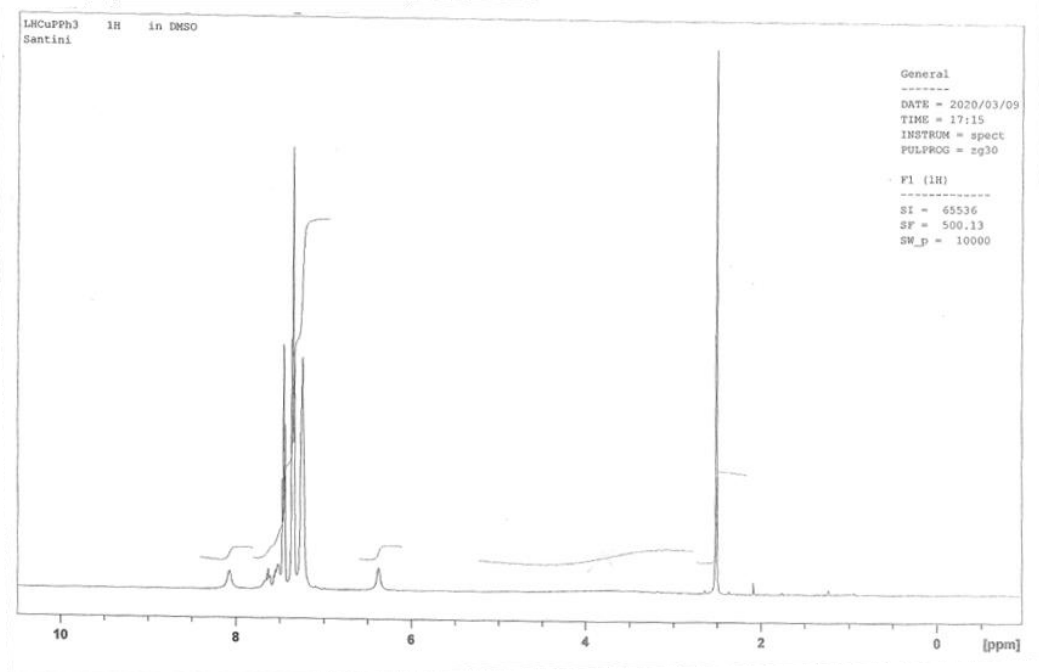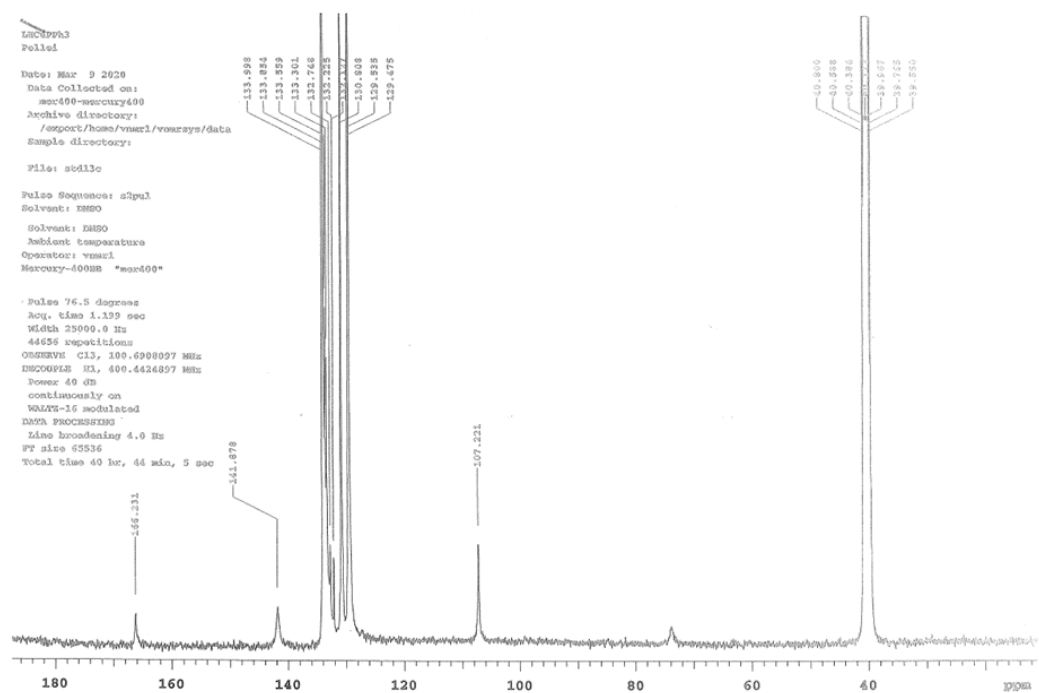

**Figure S4:**  $^1\text{H}$  NMR and  $^{13}\text{C}$  NMR spectra of **1**



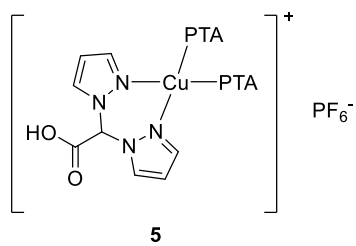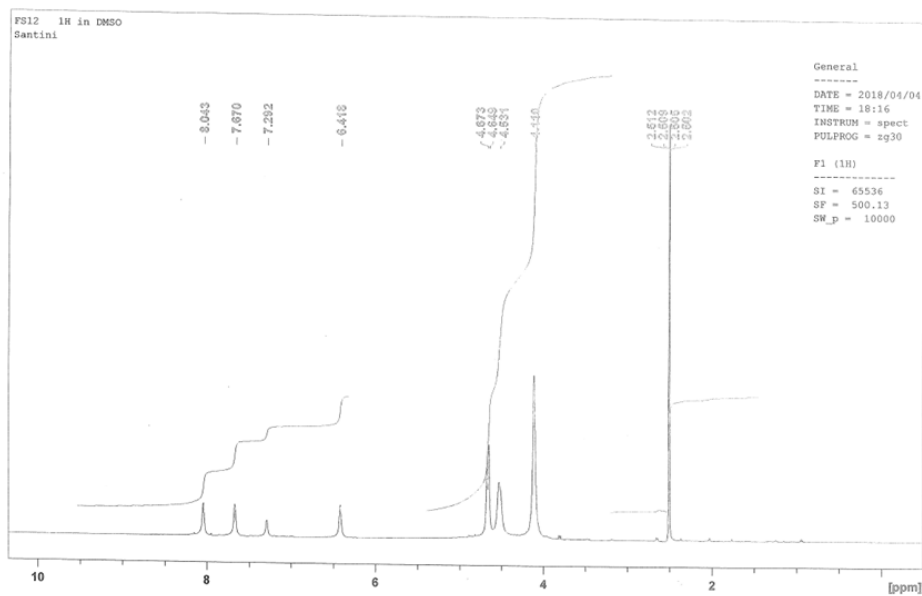

**Figure S6:**  $^1\text{H}$  NMR spectrum of **5**

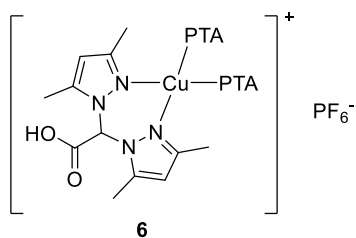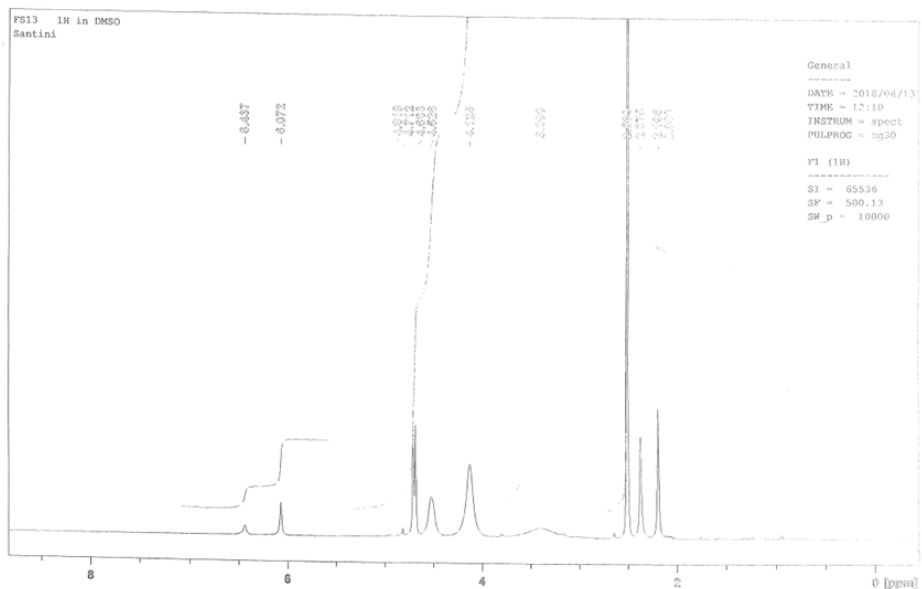

**Figure S7:**  $^1\text{H}$  NMR spectrum of **6**

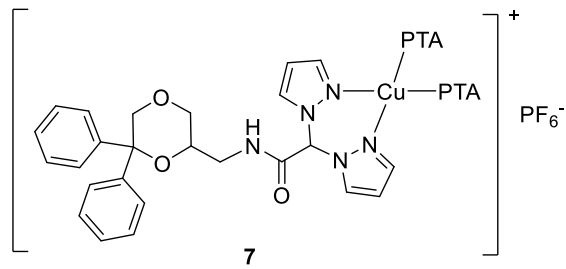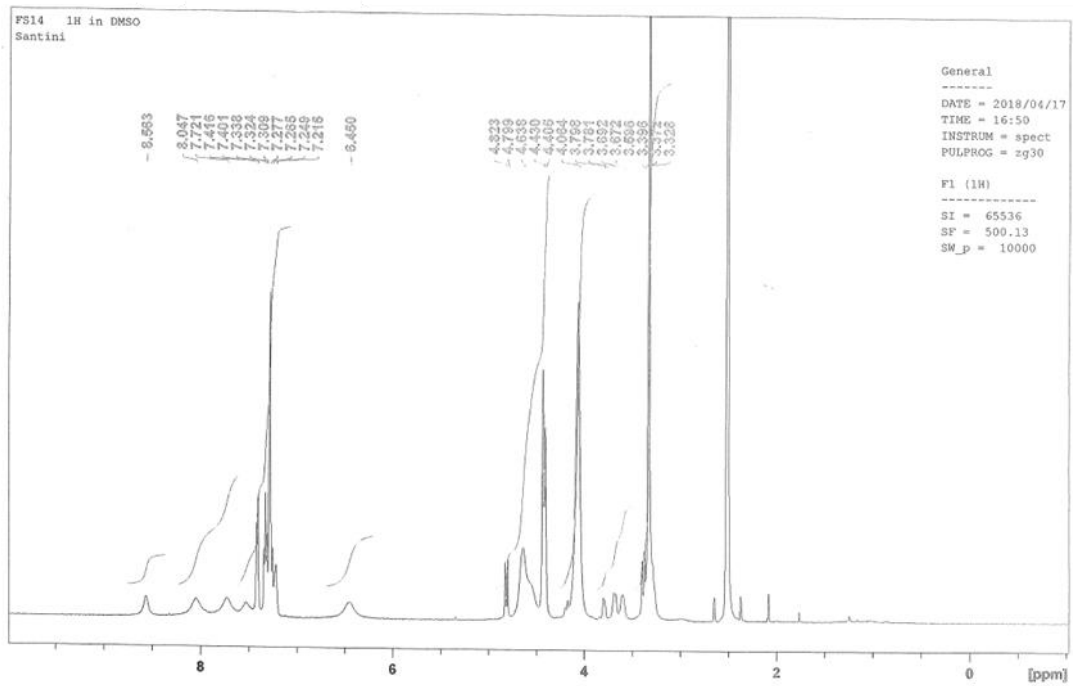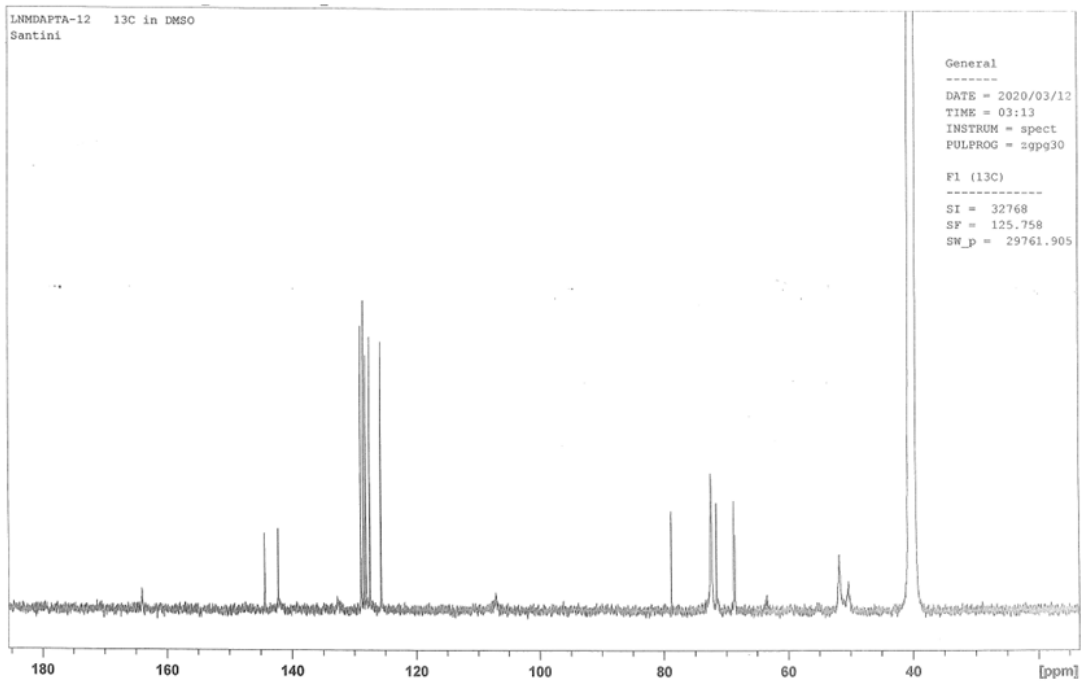



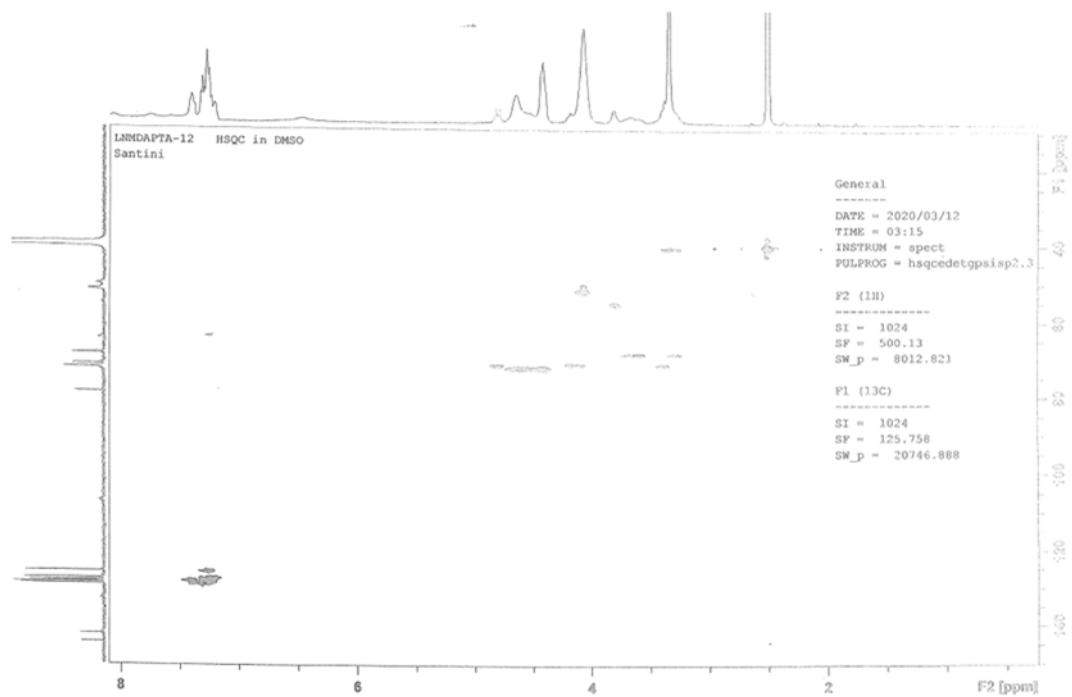

**Figure S8:**  $^1\text{H}$  NMR,  $^{13}\text{C}$  NMR and C/H COSY spectra of **7**

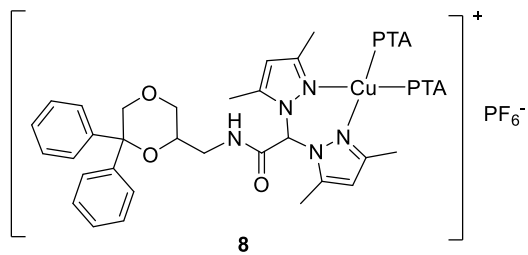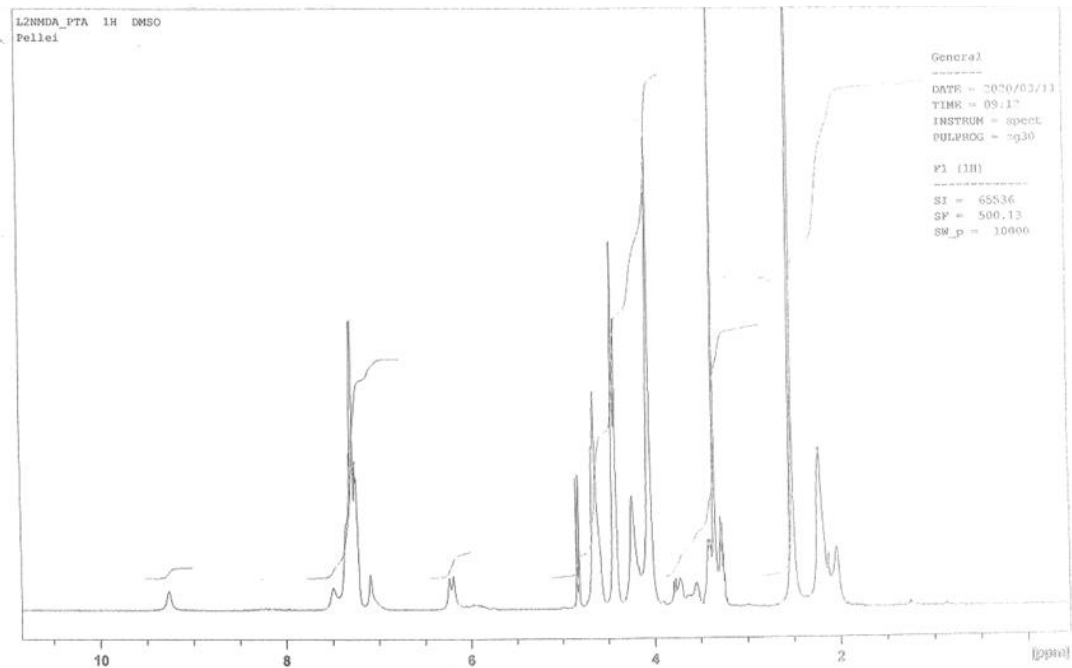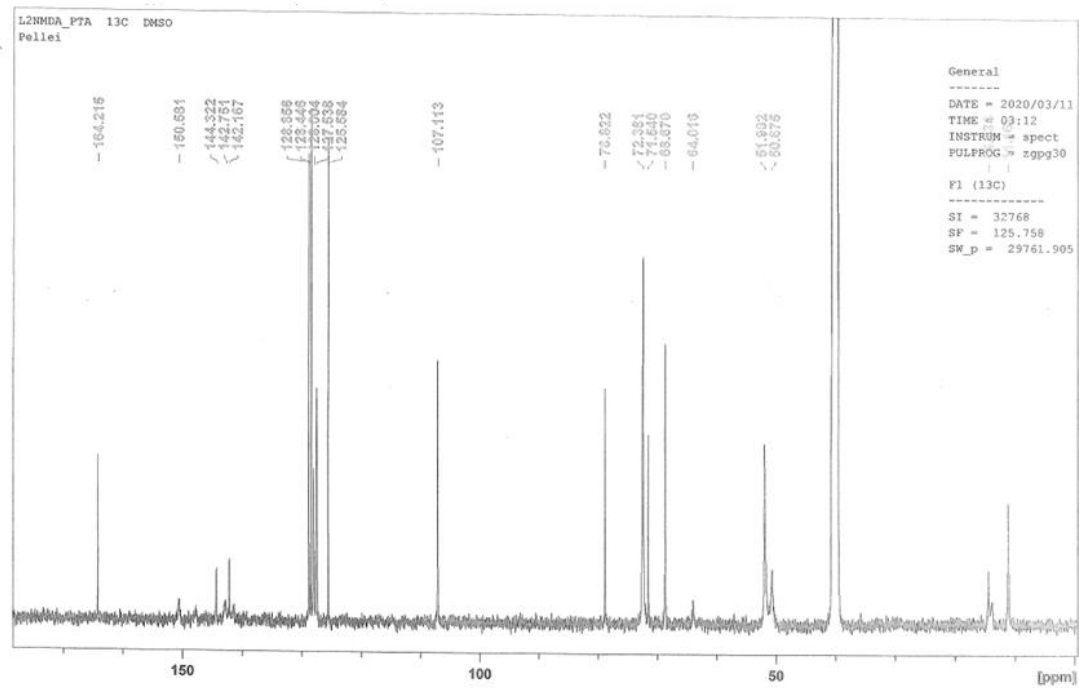

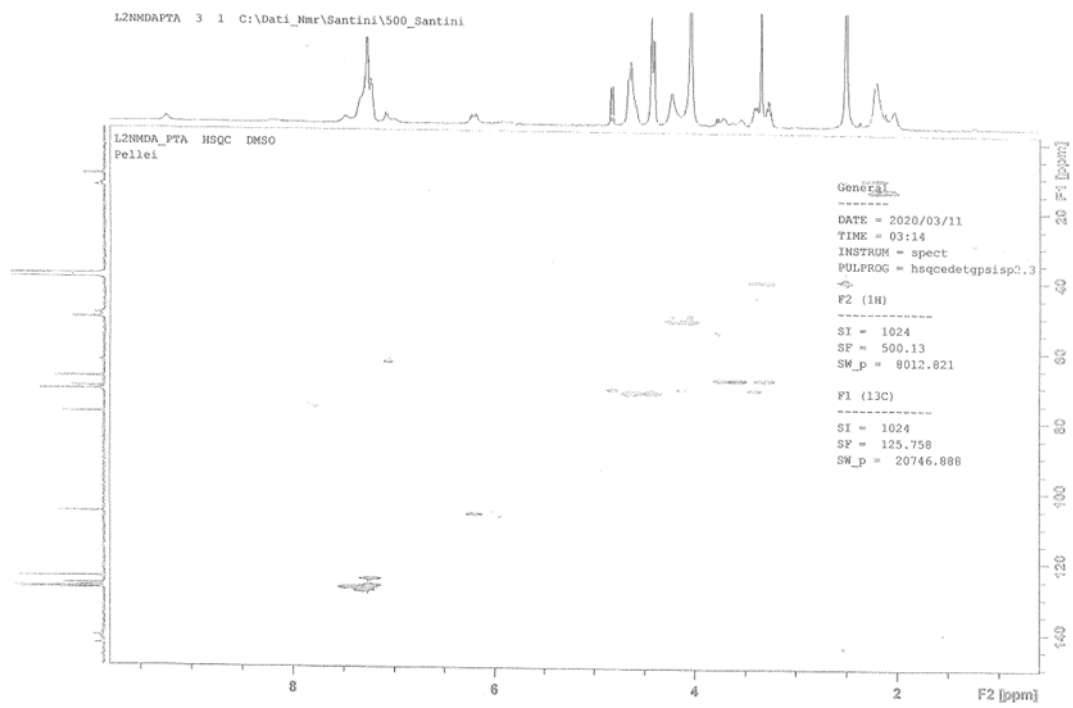

**Figure S9:**  $^1\text{H}$  NMR,  $^{13}\text{C}$  NMR and C/H COSY spectra of **8**
